# Supplementary material for: Inoculation Pneumonia Caused by Coagulase Negative Staphylococcus
Source: PubMed Central journal article supplement (PMC6787291; doi:10.3389/fmicb.2019.02198), 2019-10-04
Supplement: Table_1.pdf [file Table_1.pdf]

1

2

**On-line Data Supplement**

3

**Supplementary Table S1**

5

## Lung injury scoring system

| Parameter                                     | Score per field |       |     |
|-----------------------------------------------|-----------------|-------|-----|
|                                               | 0               | 1     | 2   |
| A. Neutrophils in the alveolar space          | None            | 1-5   | >5  |
| B. Neutrophils in the interstitial space      | None            | 1-5   | >5  |
| C. Hyaline membranes                          | None            | 1     | >1  |
| D. Proteinaceous debris filling the airspaces | None            | 1     | >1  |
| E. Alveolar septal thickening                 | <2x             | 2x-4x | >4x |

6

Score = [(20 × A) + (14 × B) + (7 × C) + (7 × D) + (2 × E)] / (number of fields × 100)

7

**Supplementary Table S2**

9

## Primer sequences

| Target | Primers | Sequence(5'-3')         | Amplicon size(bp) |
|--------|---------|-------------------------|-------------------|
| icaA   | F       | TCTCTTGCAGGAGCAATCAA    | 188               |
|        | R       | TCAGGCACTAACATCCAGCA    |                   |
| icaD   | F       | ATGGTCAAGCCCAGACAGAG    | 198               |
|        | R       | CGTGTTTTCAACATTTAATGCAA |                   |
| lrgA   | F       | CCCTCCCAAGTTTAGTTTGTT   | 315               |
|        | R       | ATTCCTATGCCAGCGTCAGT    |                   |
| lrgB   | F       | GGTGGAACAATGGCAACGAT    | 551               |
|        | R       | ATGGTTGCGGGGATCGTATT    |                   |
| agrA   | F       | CCGAAGCAAACAGTGCTCA     | 600               |
|        | R       | AGATTGCGCTTGCAACAGAC    |                   |
| agrB   | F       | GCTTAAACGGTTCTGGTGCT    | 276               |
|        | R       | ACACGGTGACATGCAAAAT     |                   |
| agrD   | F       | ACGTGCGATTAAAGGCTTGG    | 183               |
|        | R       | AACGCATCTTCAAGTGCTTCAG  |                   |

|      |   |                          |     |
|------|---|--------------------------|-----|
| luxS | F | GCCCAACCGCATTGTA CTTC    | 332 |
|      | R | GTTGTTGCACCTTTTCGTCCG    |     |
| ebpS | F | TTCCCACCTAGAAACGCACA     | 605 |
|      | R | TTAGCGTCACGATGGTCGTC     |     |
| fbp  | F | CCACCAATGTTTGCTCGTGT     | 292 |
|      | R | TGTTTTGAGTAGGTGGCGCT     |     |
| cbp  | F | TACGCTAGCGCAAGGTGAAT     | 383 |
|      | R | TGTTTAACGGACGGCCAACT     |     |
| atlE | F | GCAAAGGTGGTCCTGCTACT     | 594 |
|      | R | GGTAAGCGTGTGGGTCAGAA     |     |
| cidA | F | CTAGCTGGAAGTATCGTAGGCA   | 251 |
|      | R | ACCATYTTTTTCAGCGATGTAACC |     |
| cidB | F | CCCAGCGTTAGTAGGTTCCGG    | 480 |
|      | R | TTTGCGGTACCRAAAGCGTG     |     |
| srtA | F | AAACAAACACCAACCATCCCT    | 406 |
|      | R | CCCAAACACCGGTTTGTTTCAT   |     |

1

2 **Supplementary Table S3**

3

Details of *S. haemolyticus*

| Lane No. | Strain                 | Source        | Specimen origin |
|----------|------------------------|---------------|-----------------|
| 1        | <i>S. haemolyticus</i> | nursing house | nasal swabs     |
| 2        | <i>S. haemolyticus</i> | nursing house | nasal swabs     |
| 3        | <i>S. haemolyticus</i> | nursing house | axillary swabs  |
| 4        | <i>S. haemolyticus</i> | nursing house | axillary swabs  |
| 5        | <i>S. haemolyticus</i> | nursing house | axillary swabs  |
| 6        | <i>S. haemolyticus</i> | nursing house | axillary swabs  |
| 7        | <i>S. haemolyticus</i> | nursing house | axillary swabs  |
| 8        | <i>S. haemolyticus</i> | nursing house | axillary swabs  |
| 9        | <i>S. haemolyticus</i> | nursing house | axillary swabs  |
| 10       | <i>S. haemolyticus</i> | nursing house | nasal swabs     |
| 11       | <i>S. haemolyticus</i> | hospital      | blood           |
|          | Marker                 |               |                 |

|    |                                  |          |                            |
|----|----------------------------------|----------|----------------------------|
| 12 | <i>S. haemolyticus</i>           | hospital | blood                      |
| 13 | <i>S. haemolyticus</i>           | hospital | blood                      |
| 14 | <i>S. haemolyticus</i>           | hospital | blood                      |
| 15 | <i>S. haemolyticus</i>           | hospital | blood                      |
| 16 | <i>S. haemolyticus</i>           | hospital | blood                      |
| 17 | <i>S. haemolyticus</i>           | hospital | blood                      |
| 18 | <i>S. haemolyticus</i>           | hospital | blood                      |
| 19 | <i>S. haemolyticus</i>           | hospital | blood                      |
| 20 | <i>S. haemolyticus</i>           | hospital | blood(for vivo experiment) |
| 21 | <i>S. haemolyticus</i> ATCC29970 |          |                            |
| 22 | <i>S. epidermidis</i> ATCC12228  |          |                            |
| 23 | Negative                         |          |                            |

1

2 **Supplementary Table S4**

3

Antimicrobial Resistance Profile of *S. haemolyticus*

|     | Lane No. |    |    |    |    |    |    |    |    |    |
|-----|----------|----|----|----|----|----|----|----|----|----|
|     | 11       | 13 | 14 | 15 | 16 | 17 | 18 | 19 | 20 | 21 |
| P   | R        | R  | R  | R  | R  | R  | R  | R  | R  | R  |
| OX  | R        | R  | R  | R  | S  | R  | S  | R  | R  | R  |
| CIP | S        | R  | R  | R  | S  | R  | S  | S  | R  | R  |
| VA  | S        | S  | S  | S  | S  | S  | S  | S  | S  | S  |
| TE  | S        | S  | S  | R  | R  | S  | S  | S  | S  | S  |
| DA  | R        | R  | R  | R  | S  | R  | R  | S  | R  | S  |
| SXT | S        | S  | R  | S  | S  | R  | S  | S  | S  | R  |
| MXF | S        | I  | I  | R  | S  | R  | S  | S  | R  | I  |
| RD  | S        | S  | S  | S  | S  | S  | S  | S  | S  | S  |
| E   | R        | R  | R  | R  | S  | R  | S  | S  | R  | S  |
| CN  | S        | I  | R  | R  | S  | R  | S  | S  | R  | S  |
| LEV | S        | R  | R  | R  | S  | R  | S  | S  | R  | R  |
| LZD | S        | S  | S  | S  | S  | S  | S  | S  | R  | S  |

4 P, Penicillin; OX, Oxacillin; CIP, Ciprofloxacin; VA, Vancomycin; TE, Tetracycline; DA,

5 Clindamycin; SXT, Sulfamethoxazole/Trimethoprim; MXF, Moxifloxacin; RD, Rifampicin; E,

1 Erythromycin; CN, Gentamicin; LEV, Levofloxacin; LZD, Linezolid.

2

3 **Supplementary FigureS1**

4 (A-H) Gel electrophoresis of multiplex PCR showed fragments of *icaA*, *icaD*, *cbp*, *agrD*, *ebpS*,  
5 *fbp*, *srtA*, *agrA*, *agrB*, *luxS*, *cidA*, *cidB*, *lrgA*, *lrgB* and *atlE* for *S. haemolyticus*. Lanes 1 to 10  
6 are strains from nursing houses. Lanes 11 to 19 are strains from hospitals. Lane 20 is the *S.*  
7 *haemolyticus* used in our vivo experiment. Lane 21 is *S. haemolyticus* ATCC29970. Lane 22 is  
8 *S. epidermidis* ATCC12228. Lane 23 is reaction negative control.

9

10 **Supplementary Video**

11 Mice home cage activities were observed at 12 and 36 hours after inoculation of  $10^6$ ,  $10^7$  or  $10^8$   
12 CFU of *S. haemolyticus*, respectively. The video loop of inoculation of  $10^8$  at 12 hours showed  
13 markedly altered behavioral performance, such as horizontal locomotion, climbing the cage lid,  
14 hanging on the lid and jumping, when compared with other groups.
